# Supplementary material for: The impact of implementing a hospital electronic prescribing and administration system on clinical pharmacists’ activities - a mixed methods study
Source: PubMed Central journal article supplement (PMC6417214; doi:10.1186/s12913-019-3986-4), 2019-03-12
Supplement: 12913_2019_3986_MOESM1_ESM.pdf [file 12913_2019_3986_MOESM1_ESM.pdf]

**Additional file 1** Quantitative work-sampling task definitions with inclusion and exclusion examples, adapted from Schofield et al [1]. Legend: Tasks are grouped into those that are value-added and non-value-added from a patient’s perspective, based on Lean methodology, to facilitate identification of potentially ‘wasteful’ or non-value-added steps [2]. Codes listed were those used during data collection.

| Code                        | Task                                  | Task definition                                                                                                                                                                                                                                                                                                                                    | Inclusions and exclusions                                                                                                                                                                                                                                                                                                                                                                                                                                                                                |
|-----------------------------|---------------------------------------|----------------------------------------------------------------------------------------------------------------------------------------------------------------------------------------------------------------------------------------------------------------------------------------------------------------------------------------------------|----------------------------------------------------------------------------------------------------------------------------------------------------------------------------------------------------------------------------------------------------------------------------------------------------------------------------------------------------------------------------------------------------------------------------------------------------------------------------------------------------------|
| <b>A. Value-added tasks</b> |                                       |                                                                                                                                                                                                                                                                                                                                                    |                                                                                                                                                                                                                                                                                                                                                                                                                                                                                                          |
| <b>Rxl</b>                  | 1. Prescribing medication (Inpatient) | This involves prescribing medication for inpatient administration.                                                                                                                                                                                                                                                                                 | <u>Includes:</u> Writing/entering a new medication order, changing orders, and giving a verbal order for inpatient administration<br><u>Excludes:</u> Re-writing/re-entering orders (eg re-writing due to legibility issues, see <b>Transc</b> ), prescribing for discharge ( <b>RxD</b> )                                                                                                                                                                                                               |
| <b>RxD</b>                  | 2. Prescribing medication (Discharge) | This involves prescribing medication and/or completing discharge information to communicate plan for a patient’s treatment at discharge.                                                                                                                                                                                                           | <u>Includes:</u> Writing/entering a new medication order, changing orders, and giving a verbal order for discharge<br><u>Excludes:</u> Re-writing/re-entering orders (eg re-writing due to legibility issues, see <b>Transc</b> ), writing a new inpatient medication order, changing inpatient orders, giving verbal orders for inpatient administration ( <b>Rxl</b> ).                                                                                                                                |
| <b>Transc</b>               | 3. Transcribing medication orders     | This involves transferring medication orders previously written for inpatient use                                                                                                                                                                                                                                                                  | <u>Includes:</u> Copying medication orders from one medication chart/screen to a new medication chart/screen, re-writing orders following a request for clarification<br><u>Excludes:</u> Writing/entering a new medication order, changing orders, and giving a verbal order ( <b>Rxl</b> for inpatient use, <b>RxD</b> for discharge)                                                                                                                                                                  |
| <b>DHx</b>                  | 4. Drug history                       | This involves taking a drug history from a patient and/or other people/materials. Taking a drug history is one part of the medicines reconciliation process. Other parts of the medicines reconciliation are recorded separately: screening inpatient medication, searching for information, reviewing patient records, and medication discussion. | <u>Includes:</u> Speaking with a patient/carer about their drug history, going through a patients’ own drugs, contacting a health care professional to obtain a patient’s drug history, documenting the drug history<br><u>Excludes:</u> Discussing medications that are unrelated to the drug history with a patient/carer or health professional ( <b>DisT</b> or <b>DisC</b> ). Discussions with a patient/carer that are not medication-related ( <b>Care</b> ).                                     |
| <b>DisT</b>                 | 5. Medication discussion (technical)  | This involves discussing any legal requirements, clarification and/or any other non-clinical aspects of a medication order for inpatient use or discharge                                                                                                                                                                                          | <u>Includes:</u> Asking a prescriber to re-write/re-enter a drug order due to illegibility or legal reasons, asking another health professional to clarify the drug order, clarifying with a patient/carer about the drug order, telling another healthcare professional about the location of a medication (not searching)<br><u>Excludes:</u> Discussing a new medication order for inpatient administration or discharge ( <b>DisC</b> ), discussing drug history ( <b>DHx</b> )                      |
| <b>DisC</b>                 | 6. Medication discussion (clinical)   | This involves discussing any clinical aspects of a medication order for inpatient use or discharge                                                                                                                                                                                                                                                 | <u>Includes:</u> Clarifying the choice of drug or dosage, discussing side effects, discussing administration protocols, discussing drug choices (dose, frequency, compliance) with patient/relative, asking doctors to prescribe/amend medication order<br><u>Excludes:</u> Asking a prescriber to re-write/re-enter an illegible or incomplete order ( <b>DisT</b> ), discussing drug history ( <b>DHx</b> )                                                                                            |
| <b>H</b>                    | 7. Handover                           | This involves reviewing a handover or documenting on a handover sheet or electronic handover                                                                                                                                                                                                                                                       | <u>Includes:</u> Documenting on handover, reviewing (viewing) handover, printing handover<br><u>Excludes:</u> Discussing a patient’s drugs using the handover ( <b>DisC</b> ), non medication-related communication ( <b>Comm</b> )                                                                                                                                                                                                                                                                      |
| <b>Order</b>                | 8. Ordering medication                | This involves placing/cancelling/chasing a request for medication supply                                                                                                                                                                                                                                                                           | <u>Includes:</u> Making or taking a request (verbal, telephone, faxing) for medication supply, chasing medication to be supplied<br><u>Excludes:</u> Ordering medication from a discharge prescription ( <b>ScrD</b> )                                                                                                                                                                                                                                                                                   |
| <b>Disp</b>                 | 9. Dispensing medication              | This involves labeling, retrieving, dispensing and/or checking medications for supply against a medication order                                                                                                                                                                                                                                   | <u>Includes:</u> Amending an existing label on a medication container, searching for medication, asking for a check of the medication supplied, checking the medication supplied is the same as on the medication order, clarifying medication order for dispensing<br><u>Excludes:</u> Ordering a medication ( <b>Order</b> ), giving out medication to a healthcare professional/patient/carer ( <b>O</b> ), telling a healthcare professional the location of the medication supplied ( <b>DisT</b> ) |
| <b>ScrI</b>                 | 10. Screening Inpatient medication    | This involves clinically screen drug orders as part of planning and reviewing inpatient medication                                                                                                                                                                                                                                                 | <u>Includes:</u> Reviewing a patient’s medication for appropriateness, adding instructions to medication orders, endorsing medication orders with drug supply information for inpatient use                                                                                                                                                                                                                                                                                                              |

| Code                            | Task                                                        | Task definition                                                                                                            | Inclusions and exclusions                                                                                                                                                                                                                                                                                                                                                           |
|---------------------------------|-------------------------------------------------------------|----------------------------------------------------------------------------------------------------------------------------|-------------------------------------------------------------------------------------------------------------------------------------------------------------------------------------------------------------------------------------------------------------------------------------------------------------------------------------------------------------------------------------|
|                                 |                                                             | treatment                                                                                                                  | <u>Excludes:</u> reviewing medications for discharge ( <b>ScrD</b> ), discussing medication ( <b>DisT</b> or <b>DisC</b> ), drug history taking ( <b>DHx</b> )                                                                                                                                                                                                                      |
| <b>ScrD</b>                     | 11. Screening discharge medication                          | This involves clinically screen and add instructions to a patient's discharge summary                                      | <u>Includes:</u> Adding instructions to medication orders, endorsing medication orders with drug supply information for discharge, adding or printing information to discharge summary letter<br><u>Excludes:</u> Reviewing medications for inpatient use ( <b>ScrI</b> ), discussing medication ( <b>DisT</b> or <b>DisC</b> ), drug history taking ( <b>DHx</b> )                 |
| <b>Care</b>                     | 12. Helping patient/carer (non-medication related)          | This involves any activity that is perceived as helping a patient by the observer.                                         | <u>Includes:</u> Escorting a patient, communicating with patient/carer or visitor, making a patient comfortable, transporting a patient. All non-medication related communication with patient/carer is defined as direct care.<br><u>Excludes:</u> Medication related activities, communicating with staff member or patient regarding medications ( <b>DisT</b> or <b>DisC</b> ). |
| <b>Comm</b>                     | 13. Professional communication (not medication)             | This involves any work-related discussion with another staff member that is not medication related                         | <u>Includes:</u> Requesting medical or nurse review, planning care with any health professional, handover/parts of a ward round, telephone call<br><u>Excludes:</u> Medication related discussion with staff member or patient/carer ( <b>DisT</b> or <b>DisC</b> or <b>DHx</b> )                                                                                                   |
| <b>RevR</b>                     | 14. Reviewing patient records                               | This involves the review and/or documentation of information held on a patient's paper or electronic medical record        | <u>Includes:</u> Looking up laboratory results, patient's bedside observation records, medical notes, writing in a patient's medical notes<br><u>Excludes:</u> Reviewing the medication chart/screen ( <b>ScrI</b> or <b>ScrD</b> ), reviewing a patient's list of medications from home ( <b>DHx</b> )                                                                             |
| <b>B. Non-value-added tasks</b> |                                                             |                                                                                                                            |                                                                                                                                                                                                                                                                                                                                                                                     |
| <b>SearM</b>                    | 15. Searching for paper drug chart or computer              | This involves searching for a medication chart/device to access medication orders that was not found in its usual location | <u>Includes:</u> Looking for medication charts with drug order, asking about the location of the paper/electronic medication order, looking for a tablet device to access the electronic medication order<br><u>Excludes:</u> Looking for a patient's medical notes, looking for equipment, waiting to access the medication order if someone else is using it ( <b>WaitM</b> )     |
| <b>SearI</b>                    | 16. Searching for information                               | This involves searching for information on different drug treatments using the computer or other resources                 | <u>Includes:</u> Searching information using the computer or paper-based reference resources<br><u>Excludes:</u> Searching for medical notes ( <b>O</b> ), asking another healthcare professional ( <b>DisT</b> )                                                                                                                                                                   |
| <b>WaitM</b>                    | 17. Waiting for paper drug chart/access to medication order | This involves time spent waiting to access a drug chart/electronic medication order                                        | <u>Includes:</u> Waiting for medication charts and/or tablet device to access the electronic medication order, waiting for computer device to load medication order screen<br><u>Excludes:</u> Looking for a patient's medical notes ( <b>O</b> ), looking for equipment ( <b>SearM</b> )                                                                                           |
| <b>Trav</b>                     | 18. Travelling                                              | This involves time spent walking between patients and tasks.                                                               | <u>Includes:</u> Walking to answer a phone or bleep, walking to a new task<br><u>Excludes:</u> Travel associated with any of the pre-defined tasks in this table ( <b>Trav</b> )                                                                                                                                                                                                    |
| <b>Edu</b>                      | 19. Supervising a pre-registration pharmacist               | This involves the time spent on supervising and educating a pre-registration pharmacist                                    | <u>Includes:</u> Showing the pre-registration pharmacist how to perform a task or explaining to the student the reason behind a specific treatment                                                                                                                                                                                                                                  |
| <b>C. Other</b>                 |                                                             |                                                                                                                            |                                                                                                                                                                                                                                                                                                                                                                                     |
| <b>O</b>                        | 20. Other                                                   | Any task that is not included in the list of pre-defined tasks in this table.                                              |                                                                                                                                                                                                                                                                                                                                                                                     |

## References

- Schofield B, Cresswell K, Westbrook J, Slee A, Girling A, Shah S, et al. The impact of electronic prescribing systems on pharmacists' time and workflow: protocol for a time-and-motion study in English NHS hospitals: Table 1. *BMJ Open*. 2015;5:e008785. doi:10.1136/bmjopen-2015-008785.
- Jones D, Mitchell A, Lean Enterprise Academy UK. Lean thinking for the NHS. London; 2006.
