# Supplementary material for: The impact of implementing a hospital electronic prescribing and administration system on clinical pharmacists’ activities - a mixed methods study
Source: PubMed Central journal article supplement (PMC6417214; doi:10.1186/s12913-019-3986-4), 2019-03-12
Supplement: 12913_2019_3986_MOESM3_ESM.pdf [file 12913_2019_3986_MOESM3_ESM.pdf]

**Additional file 3.** Percentage of time spent on tasks pre- and post-electronic prescribing and medication administration (ePA).

| Task<br>(in descending order of estimated time pre-ePA) | Pre-ePA          |                          |                                | Post-ePA         |                          |                                | p-value*<br>(unpaired t-test) |
|---------------------------------------------------------|------------------|--------------------------|--------------------------------|------------------|--------------------------|--------------------------------|-------------------------------|
|                                                         | Activity samples | Percentage of total time | Estimated time overall (h:min) | Activity samples | Percentage of total time | Estimated time overall (h:min) |                               |
| Professional communication (not medication)             | 205              | 15.9                     | 6:56                           | 329              | 15.1                     | 11:05                          | 0.62                          |
| Screening inpatient medication                          | 149              | 11.6                     | 5:02                           | 378              | 17.4                     | 12:44                          | 0.20                          |
| Screening discharge medication                          | 142              | 11.0                     | 4:48                           | 135              | 6.2                      | 4:33                           | 0.45                          |
| Medication discussion (clinical)                        | 110              | 8.6                      | 3:43                           | 156              | 7.2                      | 5:15                           | 0.37                          |
| Reviewing patient records                               | 107              | 8.3                      | 3:37                           | 172              | 7.9                      | 5:48                           | 0.91                          |
| Drug history                                            | 83               | 6.5                      | 2:48                           | 287              | 13.2                     | 9:40                           | 0.02                          |
| Travelling                                              | 77               | 6.0                      | 2:36                           | 113              | 5.2                      | 3:49                           | 0.96                          |
| Handover                                                | 69               | 5.4                      | 2:20                           | 148              | 6.8                      | 4:59                           | 0.37                          |
| Ordering medication                                     | 55               | 4.3                      | 1:52                           | 84               | 3.9                      | 2:50                           | 0.75                          |
| Supervising a pre-registration pharmacist               | 51               | 4.0                      | 1:43                           | 13               | 0.6                      | 0:26                           | 0.76                          |
| Dispensing medication                                   | 40               | 3.1                      | 1:21                           | 30               | 1.4                      | 1:06                           | 0.95                          |
| Medication discussion (technical)                       | 35               | 2.7                      | 1:11                           | 62               | 2.8                      | 2:05                           | 0.62                          |
| Searching for information                               | 18               | 1.4                      | 0:37                           | 64               | 2.9                      | 2:09                           | 0.30                          |
| Waiting for paper drug chart/access to medication order | 18               | 1.4                      | 0:37                           | 61               | 2.8                      | 2:03                           | 0.07                          |
| Helping patient/carer (non-medication related)          | 18               | 1.4                      | 0:37                           | 14               | 0.6                      | 0:28                           | 0.50                          |
| Transcribing medication orders                          | 16               | 1.2                      | 0:32                           | 40               | 1.8                      | 1:21                           | 0.11                          |
| Searching for paper drug charts or computer             | 15               | 1.2                      | 0:30                           | 0                | 0                        | 0:00                           | 0.00                          |
| Prescribing medication (inpatient)                      | 0                | 0.0                      | 0:00                           | 0                | 0                        | 0:00                           | ---                           |
| Prescribing medication (discharge)                      | 0                | 0.0                      | 0:00                           | 0                | 0                        | 0:00                           | ---                           |
| Other                                                   | 79               | 6.1                      | 2:40                           | 90               | 4.1                      | 3:02                           | 0.49                          |
| Total                                                   | 1287             | 100                      | 43:49**                        | 2176             | 100                      | 73:26**                        |                               |

\*statistical significance based on Bonferroni p-value <0.0028

\*\*Total estimated time does not match total observed times of 43 hours 30 mins pre-ePA and 73 hours 33 mins post-ePA due to rounding of numbers.
